# Supplementary material
Source: Springer Nature journal article supplement (https://www.springermedizin.de/resource/supplementary/13051_2011_205_MOESM2_ESM.pdf/9670154)

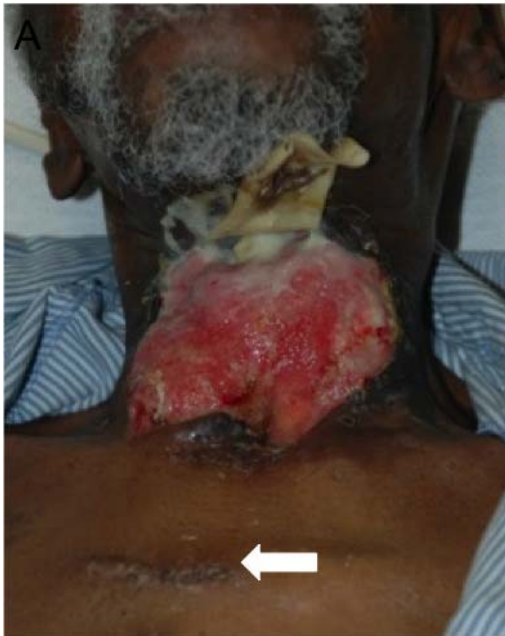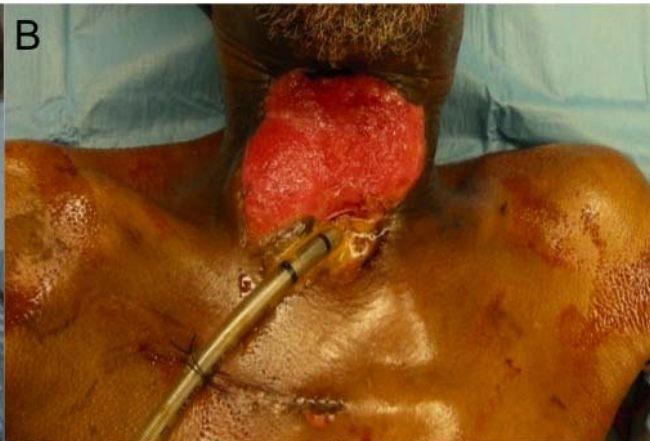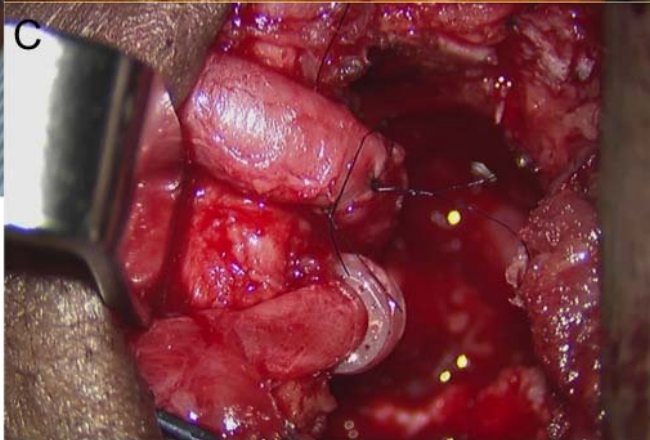

Supplement: MOESM2 [file 9670154]
